# Supplementary material for: Influence of noncovalent intramolecular and host–guest interactions on imatinib binding to MoS2 sheets: a PXRD/DFT study
Source: Royal Society of Chemistry journal article supplement (doi:10.1039/d1ce01350e), 2021-12-06
Supplement: d1ce01350e2.pdf [file d1ce01350e2.pdf]

## Supporting Information

### **Noncovalent interactions governing imatinib binding to MoS<sub>2</sub> sheets: a PXRD/DFT study**

Ivan E. Ushakov, Natalia D. Lenenko, Alexander S. Goloveshkin, Alexander A. Korlyukov,  
Alexandre S. Golub \*

A.N. Nesmeyanov Institute of Organoelement Compounds, Russian Academy of Sciences,  
Vavilova St. 28, 119991 Moscow, Russia

#### **Content**

- I. Assembling of imatinib-MoS<sub>2</sub> layered compound
- II. Structure refinement
- III. Quantum-chemical optimization and bonding interaction analysis

## I. Assembling of imatinib-MoS<sub>2</sub> layered compound

Layered compound with alternating monolayers of imatinib cations (ImaH<sup>+</sup>) and MoS<sub>2</sub> was obtained in a way similar to that previously used for preparation of various MoS<sub>2</sub>-organic compounds<sup>1</sup>. Initially, the crystalline LiMoS<sub>2</sub> has been obtained by treating purified natural molybdenum disulfide (DM-1, Scopin Factory, Russia) with a particle size (95%) smaller than 7 μm with an excess of 1.6 M n-butyllithium solution in hexane (Aldrich) for 1 week, washing in hexane and drying in vacuum. This compound has been sonicated in bi-distilled water to prepare aqueous dispersions of the concentration 2·mg·mL<sup>-1</sup>. Then, 70 ml of the MoS<sub>2</sub> dispersion have been mixed with 40 ml of the solution prepared by dissolution of imatinib mesylate (Sigma-Aldrich) in amount of 0.125 g (0.21 mmol) in water acidified by HCl. The visible formation of the particles in dispersion was observed shortly after mixing the components. After stirring the reaction mixture on a magnetic stirrer for 2 h, the precipitate was collected by centrifugation. The acidity of the first supernatant measured using a Hanna Instruments 8424 pH meter amounted to pH 4. The structure probed by powder X-ray diffraction (PXRD) just after precipitation looked nearly amorphous until the prolonged washing with water at pH 5, which yielded structured layered compound with the interlayer distance (*c*) of approximately 11.3 Å.

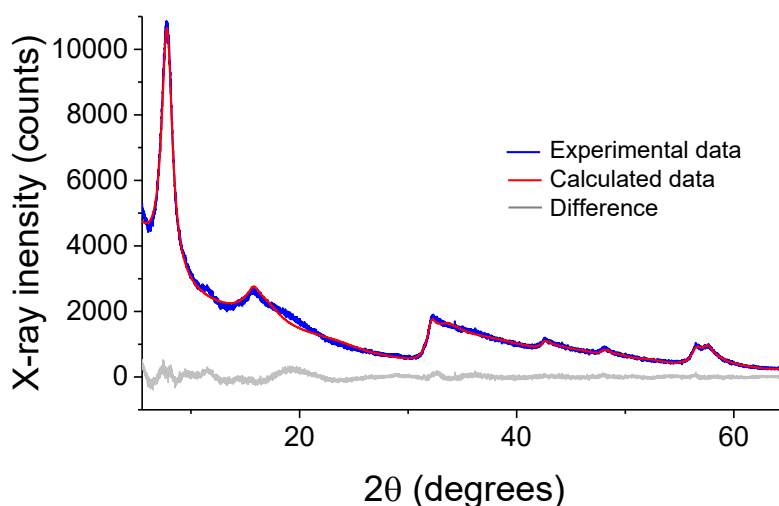

**Fig. S1** X-ray diffraction pattern of **b**-ImaH-MoS<sub>2</sub> and its fit (Rwp=4.95 %). (The pattern of **p**-ImaH-MoS<sub>2</sub> is presented in the main text.)

## II. Structure refinement

**Табле S1** Selected structural parameters of (p-ImaH)<sub>1/32</sub>MoS<sub>2</sub> obtained by PXRD pattern modeling and their relation with the parameters of the built periodic crystal structure

| Parameter                                                      | Refined cell                       | Calculated model crystal                                                   |
|----------------------------------------------------------------|------------------------------------|----------------------------------------------------------------------------|
| $a$ (Å)                                                        | $a_0 = 5.69(3)$                    | $a = 11.2627$<br>$(\vec{a} = 2\vec{a}_0)$                                  |
| $b$ (Å)                                                        | $b_0 = 3.205(18)$                  | $b = 25.0320$<br>$(\vec{b} = 8\vec{b}_0)$                                  |
| $c$ (Å)                                                        | $c_0 = 11.31(6)$ *                 | $c = 11.4584$<br>$(\vec{c} = \vec{c}_0 + \vec{\Delta}_a + \vec{\Delta}_b)$ |
| $\alpha$ (°)                                                   | 90                                 | 86.776                                                                     |
| $\beta$ (°)                                                    | 90                                 | 81.304                                                                     |
| $\gamma$ (°)                                                   | 90                                 | 90                                                                         |
| $V$ , Å <sup>3</sup>                                           | 2063(19)                           | 3188.129                                                                   |
| Mo-Mo (Å)                                                      | 2.831(11), 3.205(18),<br>3.732(16) | 2.737, 3.122, 3.735                                                        |
| Mo-Mo-Mo (deg)                                                 | 68.9(4)                            | 69.49                                                                      |
| S-S $\Delta z_1$ , $\Delta z_2$ (Å)                            | 3.47(2), 2.515(16)                 | 3.484, 2.735                                                               |
| Height variation in<br>S positions on the<br>sheet surface (Å) | 0.477(12)                          | 0.372                                                                      |

In Ufer supercell  $c=10c_0$

**Табле S2** Selected structural parameters of (b-ImaH)<sub>1/32</sub>MoS<sub>2</sub> obtained by PXRD pattern modeling and their relation with the parameters of the built periodic crystal structure

| Parameter                                                      | Refined cell                   | Calculated model crystal                                                   |
|----------------------------------------------------------------|--------------------------------|----------------------------------------------------------------------------|
| $a$ (Å)                                                        | $a_0 = 5.70(4)$                | $a = 14.6616$<br>$(\vec{a} = 2\vec{a}_0 + 3\vec{b}_0)$                     |
| $b$ (Å)                                                        | $b_0 = 3.22(2)$                | $b = 25.0320$<br>$(\vec{b} = 8\vec{b}_0)$                                  |
| $c$ (Å)                                                        | $c_0 = 113.1(8) *$             | $c = 11.4584$<br>$(\vec{c} = \vec{c}_0 + \vec{\Delta}_a + \vec{\Delta}_b)$ |
| $\alpha$ (°)                                                   | 90                             | 86.776                                                                     |
| $\beta$ (°)                                                    | 90                             | 81.349                                                                     |
| $\gamma$ (°)                                                   | 90                             | 50.128                                                                     |
| $V$ , Å <sup>3</sup>                                           | 2076(24)                       | 3186.3                                                                     |
| Mo-Mo (Å)                                                      | 2.839(15), 3.22(2),<br>3.74(2) | 2.734, 3.140, 3.722                                                        |
| Mo-Mo-Mo (deg)                                                 | 69.1(5)                        | 69.95                                                                      |
| S-S $\Delta z_1$ , $\Delta z_2$ (Å)                            | 3.47(3), 2.52(2)               | 3.499, 2.735                                                               |
| Height variation in<br>S positions on the<br>sheet surface (Å) | 0.477(16)                      | 0.390                                                                      |

In Ufer supercell  $c=10c_0$

**Table S3** Torsion angles Q1-Q8 (degrees) of **p**-ImaH molecule (**p**) in the free state (**fr**), in the assembled (**as**) and exfoliated (**exf**) ImaH-MoS<sub>2</sub> structure

| Angle | <b>fr-p</b> * | <b>as-p</b> | $\Delta_{\text{as-p}}$ ** | <b>exf-p</b> | $\Delta_{\text{exf}}$ ** |
|-------|---------------|-------------|---------------------------|--------------|--------------------------|
| Q1    | -160.688      | 158.70      | <b>40.61</b>              | -174.18      | <b>13.49</b>             |
| Q2    | -179.37       | -178.67     | <b>-0.7</b>               | -173.61      | <b>-5.76</b>             |
| Q3    | -0.42         | 5.89        | <b>-6.31</b>              | 0.63         | <b>-1.05</b>             |
| Q4    | 175.76        | -177.15     | <b>-7.09</b>              | 169.42       | <b>6.34</b>              |
| Q5    | 179.07        | 176.97      | <b>2.1</b>                | -179.90      | <b>-1.03</b>             |
| Q6    | 154.01        | 152.36      | <b>1.65</b>               | 144.98       | <b>9.03</b>              |
| Q7    | 54.86         | 27.44       | <b>27.42</b>              | 57.14        | <b>-2.28</b>             |
| Q8    | -169.72       | -176.68     | <b>6.96</b>               | 177.21       | <b>13.07</b>             |

\* According to ref. <sup>2</sup>

\*\*  $\Delta_{\text{as-p}}$  or  $\Delta_{\text{exf}}$  is the difference between the angles in **fr-p** and **as-p** or **exf-p**, respectively. The conjugate angle reversed in sign is given for the angles approaching +/-360°.

**Table S4** Torsion angles (degrees) of **b**-ImaH molecule (**b**) in the free state (**fr**) and in the assembled (**as**) ImaH-MoS<sub>2</sub> structure

| Angle | <b>fr-b</b> * | <b>as-b</b> | $\Delta_{\text{as-b}}$ ** |
|-------|---------------|-------------|---------------------------|
| Q1    | -30.04        | 23.52       | <b>-53.56</b>             |
| Q2    | -5.82         | -1.65       | <b>-4.17</b>              |
| Q3    | -9.85         | 2.29        | <b>-12.14</b>             |
| Q4    | 177.79        | -175.65     | <b>-6.56</b>              |
| Q5    | 177.38        | -179.19     | <b>-3.43</b>              |
| Q6    | 154.96        | -155.49     | <b>-49.55</b>             |
| Q7    | 55.89         | -10.57      | <b>66.46</b>              |
| Q8    | -169.94       | 167.57      | <b>22.49</b>              |

\* According to ref. <sup>2</sup>

\*\*  $\Delta_{\text{as-b}}$  is the difference between the angles in **fr-b** and **as-b**, respectively. The conjugate angle reversed in sign is given for the angles approaching +/-360°.

### III. Quantum-chemical optimization and bonding interaction analysis

To fulfill the requirement of strictly ordered structure for periodic calculations, we constructed the hypothetical 3D models of the structures under consideration, in which the turbostratic disorder in sheet stacking was ignored. The protonated imatinib molecules were placed at the positions obtained in structure refinement with Ufer's supercell and regularly distributed on the sulfide sheets according to the ratio which provides full filling of the interlayer:  $(\text{ImaH})_{1/32}\text{MoS}_2$ . Upon constructing the models, the unreasonably short intermolecular contacts were avoided. These 3D structural models were described with the triclinic cells with the parameters derived from the Ufer's supercell as indicated in Tables S1 and S2.

To optimize the structural model and to reveal the interactions between inorganic and organic components, periodic DFT calculations were carried out using the plane wave (PW) basis set and PBE functional (see Experimental).

**Table S5.** Calculated energies for different models of  $(\text{ImaH})_{1/32}\text{MoS}_2$

| Model        | Energy, eV |
|--------------|------------|
| <b>as-p</b>  | -1124.228  |
| <b>as-b</b>  | -1123.93   |
| <b>exf-p</b> | -1122.75   |

**Table S6** Summary of average critical point properties (a.u. if not given) in the hypothetical ordered  $(\text{p-ImaH})_{1/32}\text{MoS}_2$

| Atom1 | Atom2 | Count | d, Å        | $\rho(\mathbf{r})$ | $\nabla^2\rho(\mathbf{r})$ | $g_e(\mathbf{r})$ | $v_e(\mathbf{r})$ | $h_e(\mathbf{r})$ | Energy, kcal/mol |
|-------|-------|-------|-------------|--------------------|----------------------------|-------------------|-------------------|-------------------|------------------|
| Mo    | Mo    | 32    | 2.735-2.740 | 0,060934           | 0,074555                   | 0,039518          | -0,060400         | -0,020880         | -18.93           |
| Mo    | S     | 96    | 2.384-2.416 | 0,088315           | 0,142308                   | 0,074031          | -0,11248          | -0,038450         | -35.25           |
| Mo    | S     | 96    | 2.463-2.497 | 0,077212           | 0,108358                   | 0,058270          | -0,089450         | -0,031180         | -28.03           |
| NH    | S     | 1     | 3.729       | 0,009976           | 0,021891                   | 0,004976          | -0,004480         | 0,000497          | -1.40            |
| CH    | S     | 21    | 3.487-4.630 | 0.004172           | 0.012206                   | 0.002405          | -0.001760         | 0.000647          | -0.6             |
| C     | S     | 13    | 3.796-4.275 | 0.002436           | 0.007350                   | 0.001358          | -0.000879         | 0.000479          | -0.28            |
| N     | S     | 4     | 4,056-4,103 | 0.002068           | 0.006879                   | 0.001243          | -0.000767         | 0.000476          | -0.24            |

**Table S7** Summary of average critical point properties (a.u. if not given) in the hypothetical ordered  $\text{exf-(p-(ImaH)}_{1/32}\text{MoS}_2$

| Atom1 | Atom2 | Count | d, Å        | $\rho(\mathbf{r})$ | $\nabla^2\rho(\mathbf{r})$ | $g_e(\mathbf{r})$ | $v_e(\mathbf{r})$ | $h_e(\mathbf{r})$ | Energy, kcal/mol |
|-------|-------|-------|-------------|--------------------|----------------------------|-------------------|-------------------|-------------------|------------------|
| Mo    | Mo    | 32    | 2.737-2.743 | 0.060953           | 0.074522                   | 0.039526          | -0.060422         | -0.020895         | -18.93           |
| Mo    | S     | 96    | 2.385-2.416 | 0.088289           | 0.142218                   | 0.073992          | -0.112429         | -0.038437         | -35.23           |
| Mo    | S     | 96    | 2.462-2.497 | 0.077189           | 0.108473                   | 0.058268          | -0.089418         | -0.031150         | -28.02           |
| CH    | S     | 15    | 3.709-4.715 | 0.003846           | 0.010703                   | 0.002121          | -0.001566         | 0.000554          | -0.49            |
| C     | S     | 2     | 4.164-4.260 | 0.001795           | 0.005244                   | 0.000950          | -0.000590         | 0.000360          | -0.18            |
| NH    | S     | 1     | 3.599       | 0.012838           | 0.026438                   | 0.006427          | -0.006245         | 0.000182          | -1.96            |
| N     | S     | 2     | 4.037-4.196 | 0.001853           | 0.005732                   | 0.001036          | -0.000640         | 0.000396          | -0.20            |

## References

- 1 A. S. Golub, Y. V. Zubavichus, Y. L. Slovokhotov, Y. N. Novikov and M. Danot, *Solid State Ion.*, 2000, **128**, 151–160.
- 2 A. V. Vologzhanina, I. E. Ushakov and A. A. Korlyukov, *Int. J. Mol. Sci.*, 2020, **21**, 8970.
